# Supplementary material for: Youth Football Players’ Psychological Well-Being: The Key Role of Relationships
Source: PubMed Central journal article supplement (PMC7683523; doi:10.3389/fpsyg.2020.567776), 2020-11-10
Supplement: Data_Sheet_1.pdf [file Data_Sheet_1.pdf]

## Supplementary Material

### Preliminary analysis

#### Ryff's Psychological Well-Being Scale (Ryff, 1989; Ryff & Keyes, 1995), RPWB-S

| Factor                            | M (SD)      | McDonald $\omega$ |
|-----------------------------------|-------------|-------------------|
| Self-acceptance                   | 9.49 (1.31) | .529              |
| Positive relationship with others | 9.92 (1.55) | .588              |
| Autonomy                          | 9.31 (1.52) | .459              |
| Purpose in Life                   | 9.46 (1.70) | .476              |
| Personal Growth                   | 9.99 (1.34) | .409              |
| Environmental mastery             | 9.18 (1.56) | .430              |

Table 1 - Factor scores for RPWB-S and McDonald Omega

|          | N   | M (SD)     | Skewness | Kurtosis |
|----------|-----|------------|----------|----------|
| PSYWB1   | 415 | 3,10 (.62) | -,314    | ,120     |
| PSYWB2   | 412 | 3,16 (.66) | -,239    | ,120     |
| PSYWB3   | 411 | 1,79 (.70) | ,534     | ,120     |
| PSYWB4   | 411 | 3,27 (.68) | -,580    | ,120     |
| PSYWB5   | 412 | 1,43 (.73) | 1,650    | ,120     |
| PSYWB6   | 410 | 3,40 (.62) | -,640    | ,121     |
| PSYWB7   | 414 | 3,16 (.56) | -,073    | ,120     |
| PSYWB8   | 410 | 1,93 (.81) | ,780     | ,121     |
| PSYWB9   | 412 | 1,75 (.81) | ,936     | ,120     |
| PSYWB10  | 415 | 3,04 (.69) | -,481    | ,120     |
| PSYWB11  | 414 | 3,23 (.64) | -,472    | ,120     |
| PSYWB12  | 412 | 2,82 (.81) | -,320    | ,120     |
| PSYWB13  | 413 | 3,08 (.69) | -,538    | ,120     |
| PSYWB14  | 407 | 1,91 (.74) | ,647     | ,121     |
| PSYWB15  | 411 | 3,14 (.91) | -,867    | ,120     |
| PSYWB16  | 412 | 3,33 (.67) | -,800    | ,120     |
| PSYWB17  | 416 | 3,31 (.70) | -,645    | ,120     |
| PSYWB18  | 415 | 1,85 (.79) | ,688     | ,120     |
| PSYWB5R  | 412 | 3,57 (.73) | -1,650   | ,120     |
| PSYWB8R  | 410 | 3,07 (.81) | -,780    | ,121     |
| PSYWB9R  | 412 | 3,25 (.81) | -,936    | ,120     |
| PSYWB14R | 407 | 3,09 (.74) | -,647    | ,121     |
| PSYWB18R | 415 | 3,15 (.79) | -,688    | ,120     |
| PSYWB3R  | 411 | 3,21 (.70) | -,534    | ,120     |

Table 2 - Item distribution for RPWB-S

| Model               | $\chi^2$ (df) | RMSEA | CFI  | WRMR  |
|---------------------|---------------|-------|------|-------|
| 18-items, 6 factors | 262.285 (120) | .053  | .880 | 1.069 |
| 15-items, 5 factors | 186.296 (80)  | .057  | .901 | 1.038 |
| 12-items, 4 factors | 100.635 (48)  | .051  | .924 | .912  |

Table 3 - CFA results for the RPWB-S tested models

| Factor correlations 12 items, 4 factors | 1       | 2      | 3       | 4 |
|-----------------------------------------|---------|--------|---------|---|
| Self-acceptance                         | 1       |        |         |   |
| Positive relationship with others       | .305*** | 1      |         |   |
| Autonomy                                | .256**  | .201*  | 1       |   |
| Purpose in Life                         | .535*** | .215** | .605*** | 1 |

\* $p < .05$ , \*\*  $p < .01$ , \*\*\*  $p < .001$

Table 4 - Factor correlation for RPWB-S final model 12 items, 4 factors solution

## Coach – Athlete Relationship Questionnaire (Jowett, 2004), C-ARQ

| Factor          | M (SD)     | $\omega$ |
|-----------------|------------|----------|
| Commitment      | 3.46 (.86) | .800     |
| Closeness       | 4.03 (.78) | .836     |
| Complementarity | 3.75 (.76) | .782     |

Table 5 - Factor scores for C-ARQ and McDonald Omega

|       | N   | M (SD)      | Skewness | Kurtosis |
|-------|-----|-------------|----------|----------|
| ALL1  | 412 | 3,77 (1.06) | -,878    | ,120     |
| ALL2  | 411 | 3,35 (1.02) | -,370    | ,120     |
| ALL3  | 412 | 3,99 (.92)  | -1,064   | ,120     |
| ALL4  | 413 | 3,95 (.96)  | -,858    | ,120     |
| ALL5  | 410 | 3,62 (1.02) | -,467    | ,121     |
| ALL6  | 412 | 3,68 (.99)  | -,544    | ,120     |
| ALL7  | 413 | 4,45 (.86)  | -1,766   | ,120     |
| ALL8  | 409 | 3,42 (1.0)  | -,272    | ,121     |
| ALL9  | 413 | 3,79 (.94)  | -,658    | ,120     |
| ALL10 | 412 | 3,97 (.97)  | -,895    | ,120     |
| ALL11 | 410 | 3,56 (1.1)  | -,605    | ,121     |

Table 6 - Item distribution for C-ARQ

| Factor          | $\chi^2$ (df) | RMSEA | CFI  | SRMR |
|-----------------|---------------|-------|------|------|
| Commitment      |               |       |      |      |
| Closeness       | 136.473 (41)  | .075  | .940 | .043 |
| Complementarity |               |       |      |      |

Table 7 - CFA results for the C-ARQ

| Factor correlations | 1      | 2      | 3 |
|---------------------|--------|--------|---|
| Commitment          | 1      |        |   |
| Closeness           | .931** | 1      |   |
| Complementarity     | .971** | .961** | 1 |

*\*p < .05, \*\* p < .01, \*\*\* p < .001*

Table 8 - Factor correlations for C-ARQ

**Peer Motivational Climate in Youth Sport Questionnaire (Ntoumanis & Vazou, 2005), PMCYS-Q**

| Factor                 | M (SD)     | McDonald $\omega$ |
|------------------------|------------|-------------------|
| Improvement            | 3.49 (.74) | .760              |
| Relatedness support    | 3.59 (.77) | .749              |
| Effort                 | 3.79 (.67) | .755              |
| Intra team competition | 3.29 (.69) | .664              |
| Intra team conflict    | 2.82 (.86) | .748              |

Table 9 - Factor scores for PMCYS-Q and McDonald Omega

|        | N   | M (SD)     | Skewness | Kurtosis |
|--------|-----|------------|----------|----------|
| PeMC1  | 410 | 3,57 (1.0) | -,429    | ,121     |
| PeMC2  | 408 | 3,55 (.91) | -,338    | ,121     |
| PeMC3  | 409 | 3,75 (.91) | -,550    | ,121     |
| PeMC4  | 408 | 3,62 (1.0) | -,476    | ,121     |
| PeMC5  | 410 | 2,72 (1.1) | ,440     | ,121     |
| PeMC6  | 408 | 3,45 (.96) | -,241    | ,121     |
| PeMC7  | 411 | 3,72 (.96) | -,483    | ,120     |
| PeMC8  | 410 | 4,06 (.83) | -,664    | ,121     |
| PeMC9  | 410 | 3,46 (.99) | -,253    | ,121     |
| PeMC10 | 410 | 2,95 (1.1) | ,129     | ,121     |
| PeMC11 | 410 | 3,66 (1.0) | -,432    | ,121     |
| PeMC12 | 410 | 3,48 (.98) | -,262    | ,121     |
| PeMC13 | 412 | 4,09 (.86) | -,756    | ,120     |
| PeMC14 | 408 | 3,37 (1.1) | -,243    | ,121     |
| PeMC15 | 407 | 3,09 (1.0) | -,021    | ,121     |
| PeMC16 | 406 | 3,32 (.96) | -,136    | ,121     |
| PeMC17 | 403 | 3,62 (.97) | -,415    | ,122     |
| PeMC18 | 404 | 3,45 (.95) | -,323    | ,121     |
| PeMC19 | 406 | 2,53 (1.2) | ,466     | ,121     |
| PeMC20 | 405 | 2,60 (1.1) | ,387     | ,121     |
| PeMC21 | 405 | 3,46 (1.0) | -,344    | ,121     |

Table 10 - Item distribution for PMCYS-Q

| Model                                                                                    | $\chi^2$ (df)    | RMSEA | CFI  | SRMR | AIC       | BIC       |
|------------------------------------------------------------------------------------------|------------------|-------|------|------|-----------|-----------|
| 5 factors                                                                                | 458.705<br>(179) | .062  | .873 | .079 | 22047.946 | 22341.481 |
| 4 factors                                                                                | 357.618<br>(129) | .066  | .863 | .080 | 19322.813 | 19564.074 |
| 4 factors + correlations<br>among items 1-3; 16-1;<br>17-16; 20-19; 20-5; 16-6;<br>20-10 | 220.649<br>(122) | .044  | .941 | .069 | 19162.055 | 19431.464 |

*\*p < .05, \*\* p < .01, \*\*\* p < .001*

Table 11 - CFA results for the PMCYS-Q

| Factor correlations        | 1       | 2       | 3       | 4 |
|----------------------------|---------|---------|---------|---|
| Improvement                | 1       |         |         |   |
| Effort                     | .938*** | 1       |         |   |
| Intra-team competitiveness | .334*** | .419*** | 1       |   |
| Intra-team conflict        | -.800   | -.068   | .608*** | 1 |

*\*p < .05, \*\* p < .01, \*\*\* p < .001*

Table 12 - Factor correlations for PMCYS-Q

### Parent-Initiated Motivational Climate (White, Duda & Hart, 1992), PIMC-Q

| Factor                                | M (SD)     | $\omega$ |
|---------------------------------------|------------|----------|
| Learning/Enjoyment climate father     | 3.81 (.56) | .544     |
| Worry Conductive climate father       | 3.37 (.67) | .584     |
| Success without effort climate father | 2.34 (.69) | .661     |
| Learning/Enjoyment climate mother     | 3.82 (.60) | .646     |
| Worry Conductive climate mother       | 3.46 (.71) | .619     |
| Success without effort climate mother | 2.40 (.81) | .737     |

Table 13 - Factor scores for PIMC-Q and McDonald Omega

|          | N   | M (SD)      | Skewness | Kurtosis |
|----------|-----|-------------|----------|----------|
| PIMC_P1  | 409 | 4,40 (.79)  | -1,375   | ,121     |
| PIMC_P2  | 409 | 4,01 (.97)  | -,857    | ,121     |
| PIMC_P3  | 405 | 2,99 (1.01) | ,043     | ,121     |
| PIMC_P4  | 405 | 4,12 (.79)  | -,886    | ,121     |
| PIMC_P5  | 407 | 3,71 (1.05) | -,700    | ,121     |
| PIMC_P6  | 403 | 2,79 (.94)  | ,101     | ,122     |
| PIMC_P7  | 407 | 3,79 (.96)  | -,648    | ,121     |
| PIMC_P8  | 405 | 3,58 (1.2)  | -,474    | ,121     |
| PIMC_P9  | 403 | 1,76 (.97)  | 1,366    | ,122     |
| PIMC_P10 | 405 | 3,55 (1.01) | -,450    | ,121     |
| PIMC_P11 | 403 | 2,84 (1.18) | ,179     | ,122     |
| PIMC_P12 | 397 | 3,16 (1.02) | -,103    | ,122     |

|          |     |             |        |      |       |      |
|----------|-----|-------------|--------|------|-------|------|
| PIMC_P13 | 405 | 2,72 (1.06) | ,318   | ,121 | -,563 | ,242 |
| PIMC_P14 | 401 | 1,85 (.98)  | 1,225  | ,122 | 1,132 | ,243 |
| PIMC_M1  | 401 | 4,47 (.78)  | -1,797 | ,122 | 3,934 | ,243 |
| PIMC_M2  | 399 | 4,12 (1.00) | -1,073 | ,122 | ,591  | ,244 |
| PIMC_M3  | 395 | 2,95 (1.08) | ,103   | ,123 | -,580 | ,245 |
| PIMC_M4  | 400 | 4,15 (.84)  | -1,022 | ,122 | 1,187 | ,243 |
| PIMC_M5  | 396 | 3,81 (1.06) | -,643  | ,123 | -,390 | ,245 |
| PIMC_M6  | 397 | 2,74 (1.04) | ,213   | ,122 | -,489 | ,244 |
| PIMC_M7  | 397 | 3,62 (1.00) | -,600  | ,122 | -,115 | ,244 |
| PIMC_M8  | 398 | 3,62 (1.12) | -,606  | ,122 | -,636 | ,244 |
| PIMC_M9  | 395 | 1,99 (1.11) | 1,082  | ,123 | ,421  | ,245 |
| PIMC_M10 | 397 | 3,71 (.94)  | -,478  | ,122 | -,070 | ,244 |
| PIMC_M11 | 392 | 2,92 (1.2)  | ,060   | ,123 | -,923 | ,246 |
| PIMC_M12 | 390 | 3,22 (1.0)  | -,133  | ,124 | -,406 | ,247 |
| PIMC_M13 | 394 | 2,86 (1.1)  | ,057   | ,123 | -,732 | ,245 |
| PIMC_M14 | 393 | 1,98 (1.08) | 1,128  | ,123 | ,649  | ,246 |

Table 14 - Item distribution for PIMC-Q

| Model                 | $\chi^2$ (df)    | RMSEA | CFI  | SRMR | AIC       | BIC       | Sample BIC |
|-----------------------|------------------|-------|------|------|-----------|-----------|------------|
| 3 factors each parent | 676.112<br>(321) | .052  | .886 | .082 | 28431.729 | 28887.467 | 28528.888  |
| 2 factors each parent | 282.513<br>(154) | .045  | .934 | .062 | 20429.485 | 20736.000 | 20494.831  |

Table 15 - CFA results for the PIMC-Q

| Factor correlations               | 1       | 2       | 3       | 4 |
|-----------------------------------|---------|---------|---------|---|
| Learning/Enjoyment climate father | 1       |         |         |   |
| Worry Conductive climate father   | .521*** | 1       |         |   |
| Learning/Enjoyment climate mother | .655*** | .433*** | 1       |   |
| Worry Conductive climate mother   | .329*** | .729*** | .536*** | 1 |

\* $p < .05$ , \*\*  $p < .01$ , \*\*\*  $p < .001$

Table 16 - Factor correlations for PIMC-Q

### Structural Equation Model results

| Factor                | M (SD)     |
|-----------------------|------------|
| Coach Commitment      | 3.45 (.86) |
| Coach Closeness       | 4.03 (.78) |
| Coach Complementarity | 3.75 (.76) |

|                                            |            |
|--------------------------------------------|------------|
| <b>Team Improvement</b>                    | 3.49 (.74) |
| <b>Team Effort</b>                         | 3.79 (.66) |
| <b>Intra-Team Competitiveness</b>          | 3.30 (.68) |
| <b>Intra-Team Conflict</b>                 | 2.82 (.86) |
| <b>Learning/enjoyment climate (father)</b> | 3.80 (.56) |
| <b>Learning/enjoyment climate (mother)</b> | 3.82 (.60) |
| <b>Worry Conductive climate (father)</b>   | 3.37 (.67) |
| <b>Worry Conductive climate (mother)</b>   | 3.46 (.71) |
| <b>Self-acceptance</b>                     | 3.16 (.43) |
| <b>Positive relationship</b>               | 3.30 (.51) |
| <b>Autonomy</b>                            | 3.10 (.50) |
| <b>Meaning in life</b>                     | 3.15 (.56) |

Table 17 – Factor scores

**One-way Analysis of Variance on competitive levels of players**

|                              | <b>G1 Elite</b> |           | <b>G2 Sub-elite</b> |           | <b>G3 Amateurs</b> |           |
|------------------------------|-----------------|-----------|---------------------|-----------|--------------------|-----------|
|                              | <b>M</b>        | <b>SD</b> | <b>M</b>            | <b>SD</b> | <b>M</b>           | <b>SD</b> |
| <b>PWB_composite</b>         | 9.85            | .85       | 9.56                | .94       | 9.31               | .94       |
| <b>PWB_autonomy</b>          | 9.72            | 1.49      | 9.37                | 1.46      | 8.87               | 1.51      |
| <b>PWB_meaning</b>           | 9.95            | 1.36      | 9.50                | 1.85      | 8.95               | 1.65      |
| <b>PWB_self-acceptance</b>   | 9.75            | 1.25      | 9.41                | 1.32      | 9.35               | 1.31      |
| <b>PWB_positive relation</b> | 9.93            | 1.47      | 9.93                | 1.51      | 9.91               | 1.68      |
| <b>PARENT_worry</b>          | 3.55            | .58       | 3.46                | .62       | 3.25               | .70       |
| <b>PARENT_learn</b>          | 3.91            | .48       | 3.87                | .49       | 3.68               | .60       |
| <b>COACH_composite</b>       | 3.72            | .67       | 3.85                | .64       | 3.63               | .89       |
| <b>COACH_closeness</b>       | 4.10            | .64       | 4.14                | .70       | 3.84               | .95       |
| <b>COACH_complementarity</b> | 3.67            | .69       | 3.88                | .68       | 3.67               | .90       |
| <b>COACH_committment</b>     | 3.40            | .85       | 3.54                | .79       | 3.43               | .94       |
| <b>TEAM_learning</b>         | 3.51            | .68       | 3.49                | .78       | 3.47               | .76       |
| <b>TEAM_effort</b>           | 3.87            | .60       | 3.79                | .68       | 3.72               | .71       |
| <b>TEAM_intra-compet</b>     | 3.15            | .62       | 3.33                | .67       | 3.41               | .75       |
| <b>TEAM_intra-conflict</b>   | 2.63            | .70       | 2.79                | .96       | 3.05               | .85       |

Table 18 - One Way ANOVA results

| <i>PWB composite</i> | <i>df</i> | <i>SS</i> | <i>MS</i> | <i>F</i> | <i>p.</i> |
|----------------------|-----------|-----------|-----------|----------|-----------|
| Between groups       | 2         | 17.852    | 8.926     | 11.079   | .001      |
| Within groups        | 378       | 318.266   | .842      |          |           |
| Total                | 380       | 336.118   |           |          |           |

Table 19 - One Way ANOVA results for PWB composite

| <i>PWB Autonomy</i> | <i>df</i> | <i>SS</i> | <i>MS</i> | <i>F</i> | <i>p.</i> |
|---------------------|-----------|-----------|-----------|----------|-----------|
| Between groups      | 2         | 44.205    | 22.102    | 9.714    | .001      |
| Within groups       | 394       | 875.805   | 2.223     |          |           |
| Total               | 396       | 920.010   |           |          |           |

Table 20 - One Way ANOVA results for Autonomy

| <i>PWB Meaning</i> | <i>Df</i> | <i>SS</i> | <i>MS</i> | <i>F</i> | <i>p.</i> |
|--------------------|-----------|-----------|-----------|----------|-----------|
| Between groups     | 2         | 61.421    | 30.711    | 13.321   | .001      |
| Within groups      | 401       | 1105.161  | 2.756     |          |           |
| Total              | 403       | 1166.582  |           |          |           |

Table 21 - One Way ANOVA results for Meaning

| <i>Parent Worry</i> | <i>df</i> | <i>SS</i> | <i>MS</i> | <i>F</i> | <i>p.</i> |
|---------------------|-----------|-----------|-----------|----------|-----------|
| Between groups      | 2         | 5.259     | 2.629     | 6.463    | .002      |
| Within groups       | 367       | 149.308   | .407      |          |           |
| Total               | 369       | 154.566   |           |          |           |

Table 22 - One Way ANOVA results for Parental Worry

| <i>Parent Learning</i> | <i>df</i> | <i>SS</i> | <i>MS</i> | <i>F</i> | <i>p.</i> |
|------------------------|-----------|-----------|-----------|----------|-----------|
| Between groups         | 2         | 3.469     | 1.735     | 6.174    | .002      |
| Within groups          | 367       | 103.120   | .281      |          |           |
| Total                  | 369       | 106.590   |           |          |           |

Table 23 - One Way ANOVA results for Parental Learning

| <i>Coach Closeness</i> | <i>df</i> | <i>SS</i> | <i>MS</i> | <i>F</i> | <i>p.</i> |
|------------------------|-----------|-----------|-----------|----------|-----------|
| Between groups         | 2         | 7.228     | 3.614     | 6.041    | .003      |
| Within groups          | 408       | 244.090   | .598      |          |           |
| Total                  | 410       | 251.318   |           |          |           |

Table 24 - One Way ANOVA results for Coach Closeness

| <i>Intra team conflict</i> | <i>df</i> | <i>SS</i> | <i>MS</i> | <i>F</i> | <i>p.</i> |
|----------------------------|-----------|-----------|-----------|----------|-----------|
| Between groups             | 2         | 11.122    | 5.561     | 7.601    | .001      |
| Within groups              | 399       | 291.915   | .732      |          |           |
| Total                      | 401       | 303.036   |           |          |           |

Table 25 - One Way ANOVA results for Intra Team Conflict
